# Supplementary material for: Ampicillin-controlled glucose metabolism manipulates the transition from tolerance to resistance in bacteria
Source: PubMed Central journal article supplement — Sci Adv. 2023 Mar 8;9(10):eade8582. doi: 10.1126/sciadv.ade8582 (PMC9995076; doi:10.1126/sciadv.ade8582), 2023-03-08
Supplement: sciadv.ade8582_sm.pdf [file sciadv.ade8582_sm.pdf]

Supplementary Materials for  
**Ampicillin-controlled glucose metabolism manipulates the transition from  
tolerance to resistance in bacteria**

Ming Jiang *et al.*

Corresponding author: Bo Peng, pengb26@sysu.edu.cn

*Sci. Adv.* **9**, eade8582 (2023)  
DOI: 10.1126/sciadv.ade8582

**This PDF file includes:**

Figs. S1 to S18  
Tables S1 to S4

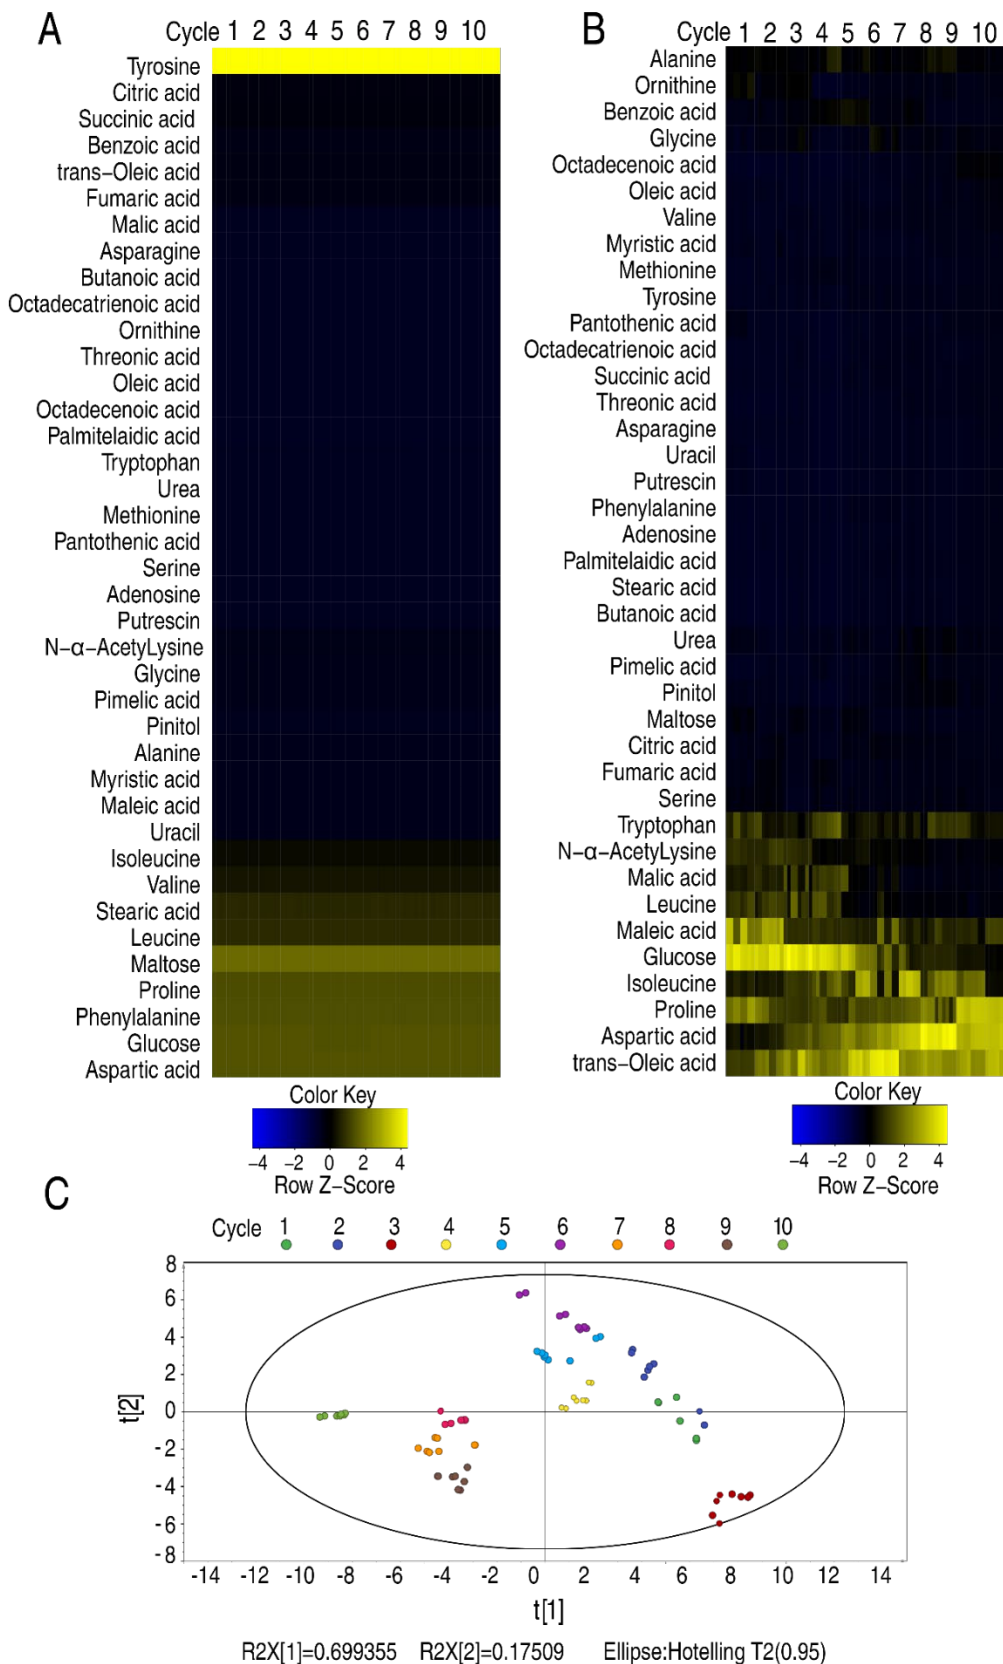

**Fig. S1 Metabolic profile of bacterial cycles of daily intermittent exposure to ampicillin. A and B, Heatmaps for control and test groups, respectively. C, PCA analysis of metabolomic profiling of samples from daily intermittent exposure to ampicillin. Each dot represents the technique replicates in the plot.**

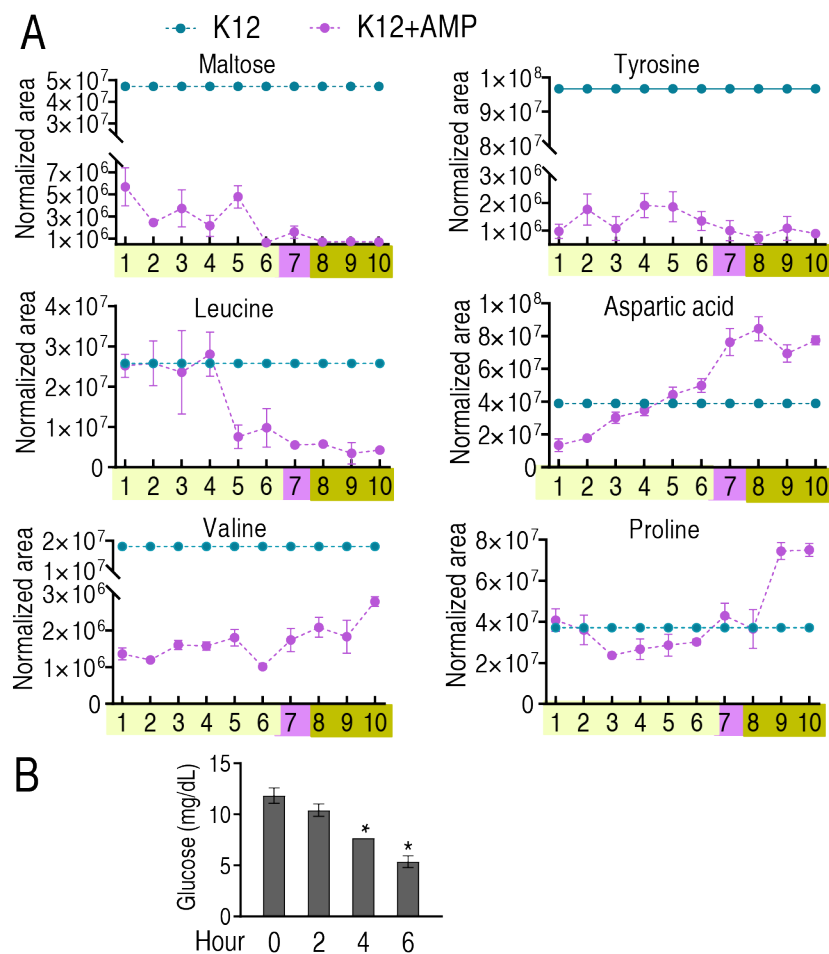

**Fig. S2 Abundance of putative biomarkers as a function of increasing tolerance/resistance to ampicillin, as shown in (Fig. 1A) and glucose in LB medium and with culture period (B).** Results are displayed as mean  $\pm$  SEM, and statistically significant differences are identified by Kruskal–Wallis followed by Dunn’s multiple comparison post hoc test. \*,  $P < 0.05$ .

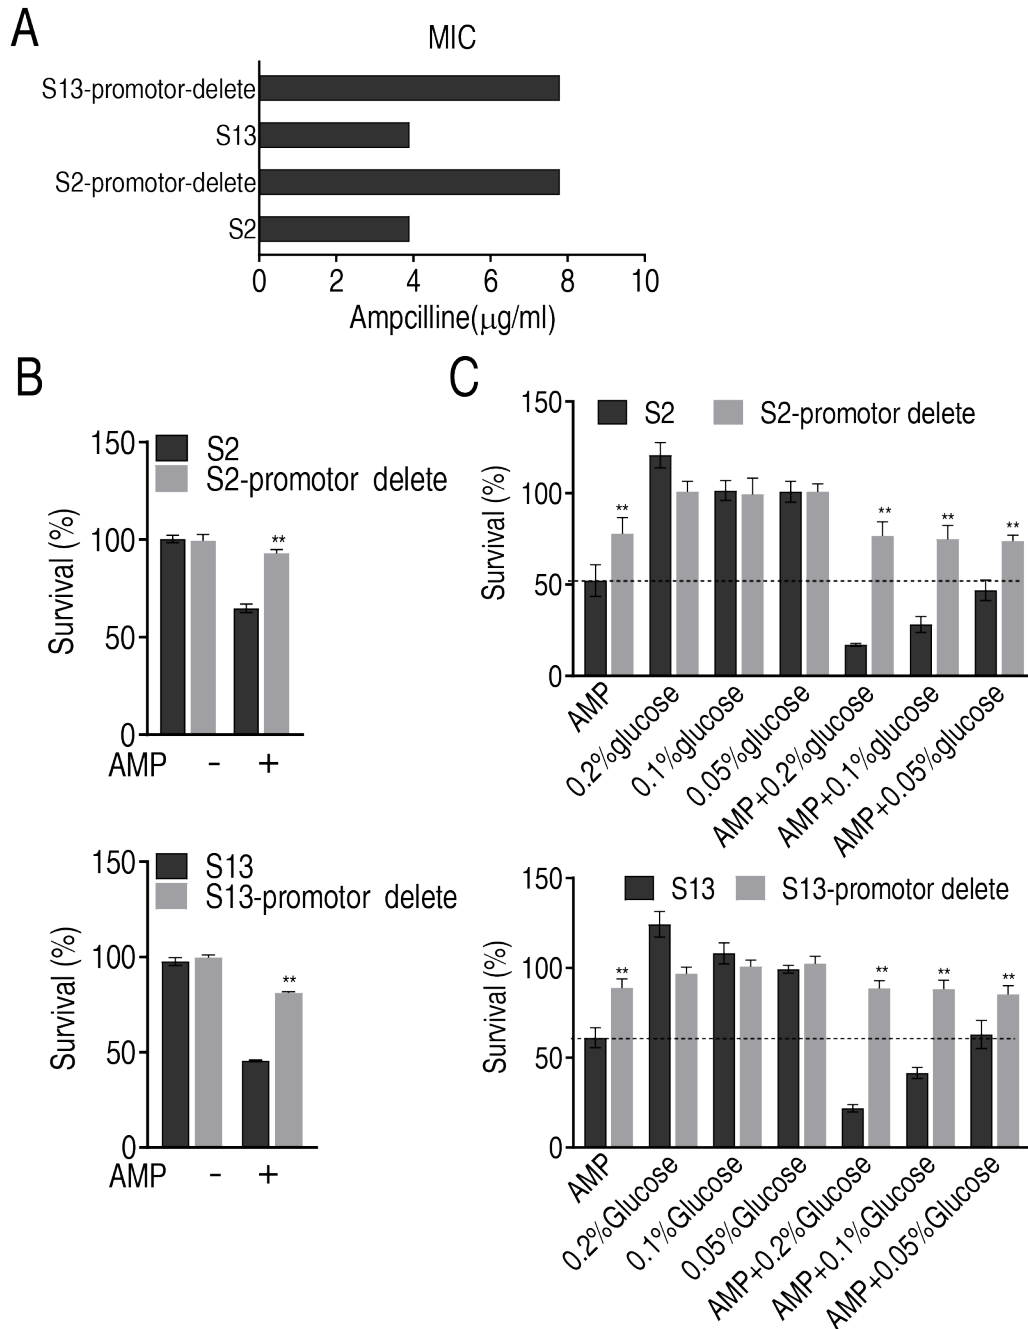

**Fig. S3 MIC (A) and viability (B and C) of clinically isolated antibiotic-resistant *E. coli* strains with loss of promoter. B**, Percent survival of bacteria inoculated by 1:1000 in LB medium with 2 µg/mL ampicillin and cultured for 6 h. **C**, Percent survival of bacteria in M9 medium in the presence of the indicated glucose plus 2 µg/mL ampicillin. Results are displayed as mean ± SEM, and statistically significant differences are identified by Kruskal–Wallis followed by Dunn’s multiple comparison post hoc test. \*\*,  $P < 0.01$ .

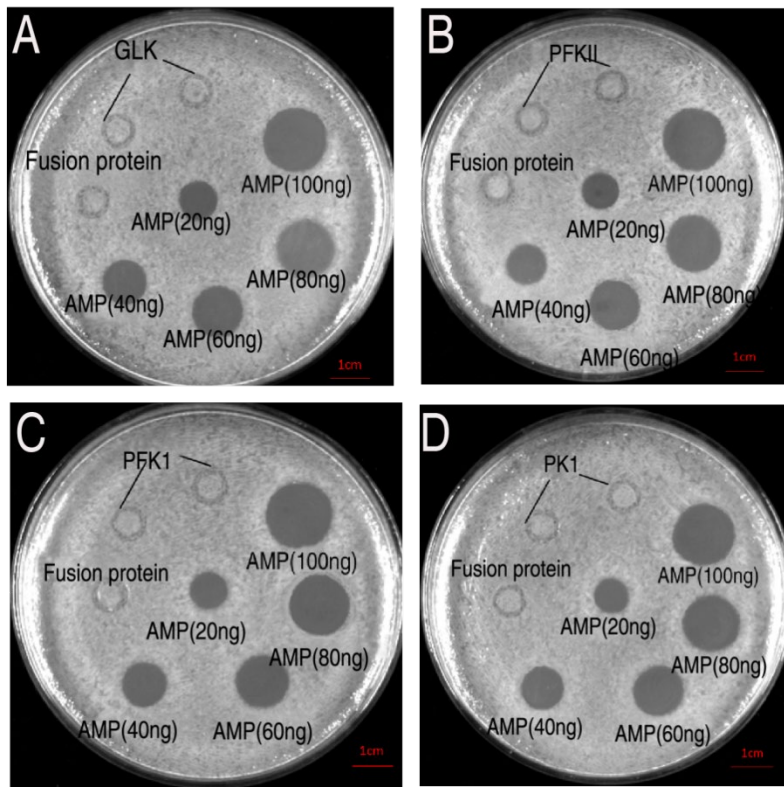

**Fig. S4 Oxford cup test for ampicillin-binding capability of GLK (A), PFKII (B), PFK1 (C) and PK1 (D).** Purified recombinant proteins (GLK, PFK1, PFKII, and PK1) were separately mixed with ampicillin and then proteins were precipitated by acetone. The precipitated proteins were diluted and used for the test. Fusion protein was used as negative control.

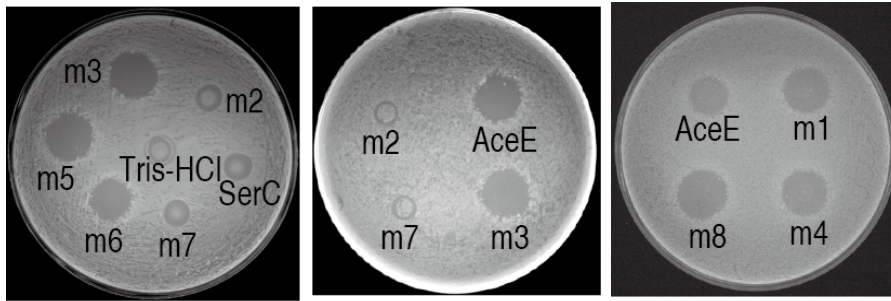

**Fig. S5 Oxford cup test for ampicillin-binding capability of single amino point-mutated AceE.** G232A (m1), G232S (m2), G232M (m3), N259Q (m4), C260S (m5), C264N (m6), R266A (m7), D266A (m8). SerC, phosphoserine/phosphohydroxythreonine aminotransferase, is used as a recombinant protein control.

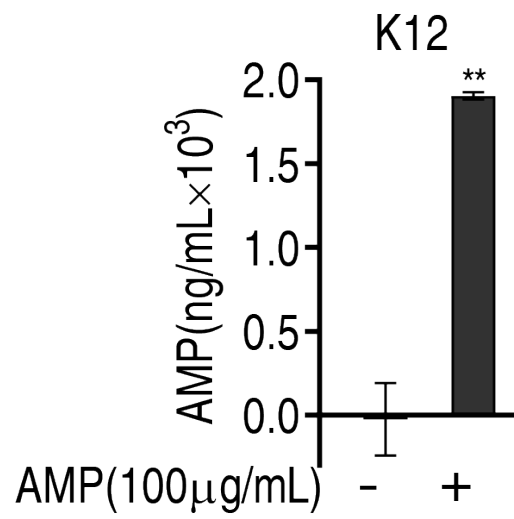

**Fig. S6 Intracellular ampicillin concentration in the presence or absence of 100 µg/mL ampicillin.** Results are displayed as mean  $\pm$  SEM, and statistically significant differences are identified by Kruskal–Wallis followed by Dunn’s multiple comparison post hoc test. \*\*,  $P < 0.01$ .

A

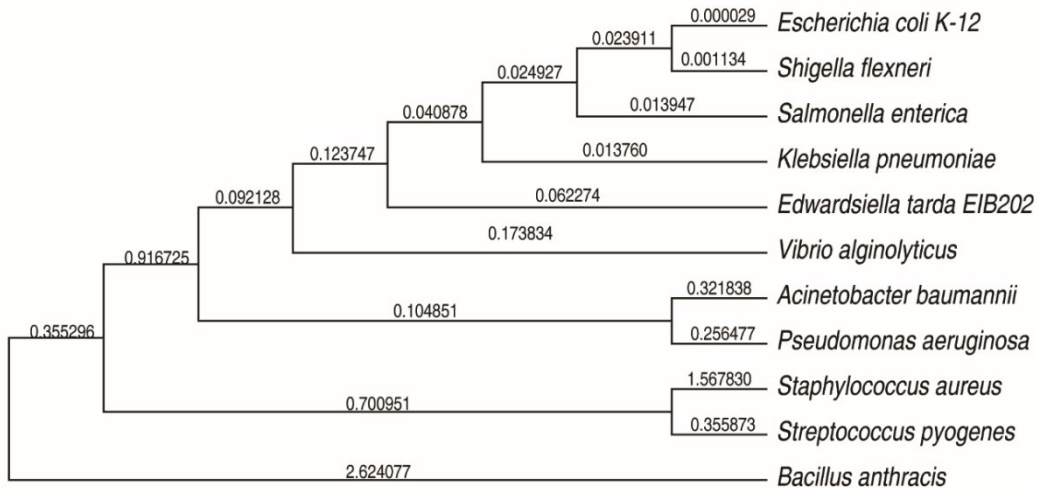

B

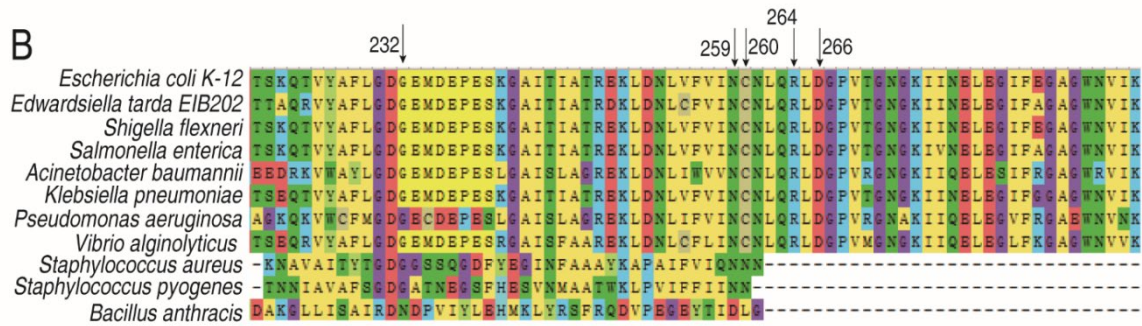

**Fig. S7 Blast analysis of the putative binding pocket in AceE positions 229-269 as primers. (A)** Phylogenetic tree. Branch length values are indicated above the branch. The phylogenetic tree was constructed by using the ML method with 100 bootstraps (MEGA version 11, [www.megasoftware.net](http://www.megasoftware.net)). **(B)** Blast analysis of the putative binding pocket. The indicated amino acid sequences of AceE was aligned by ClustaIW. Genome accession number, PRJNA909844



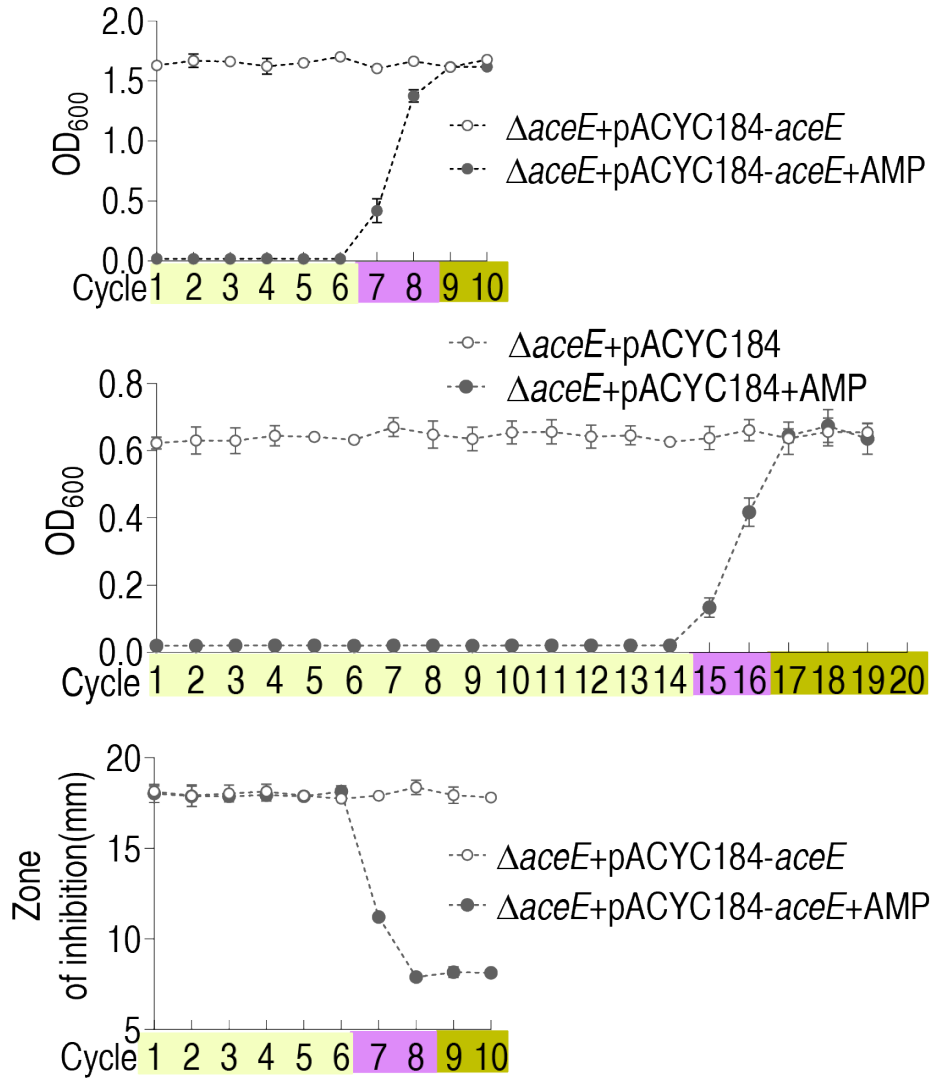

**Fig. S8 Growth/viability of  $\Delta aceE$ -pACYC184 cells (upper) and  $\Delta aceE$ -pACYC184-*aceE* cells (middle) and MIC of  $\Delta aceE$ -pACYC184-*aceE* cells (lower) were estimated from OD<sub>600</sub> and zone, respectively, after indicated number of cycles of exposure to ampicillin. Bacteria are treated using 100  $\mu$ g/mL ampicillin for 4.5 h and then grown at 37 °C for 16h.  $\Delta aceE$ -pACYC184 + AMP, with ampicillin;  $\Delta aceE$ -pACYC184, without ampicillin.**

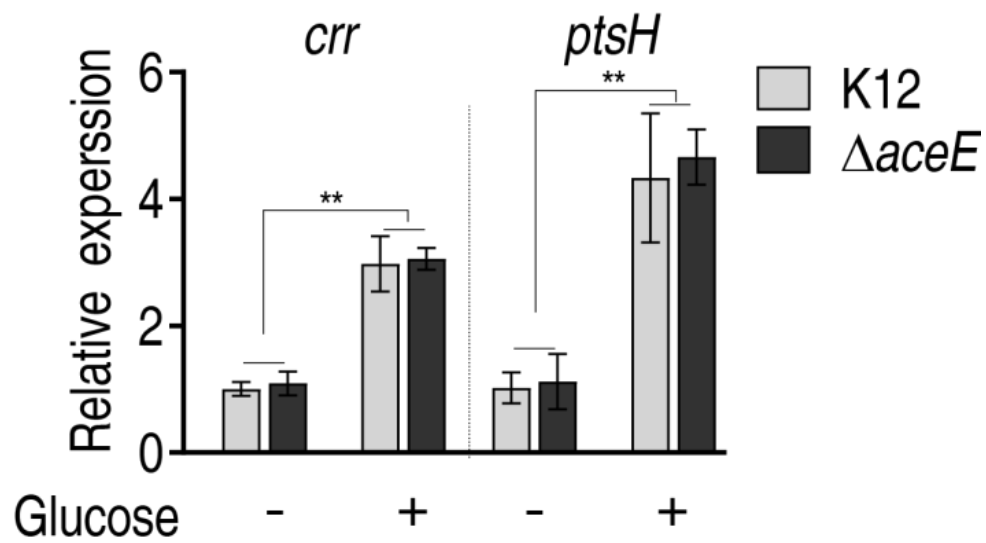

Fig. S9 qRT-PCR for expression of *crr* and *ptsH* in the presence or absence of glucose in K12 and *aceE*-deleted mutant.

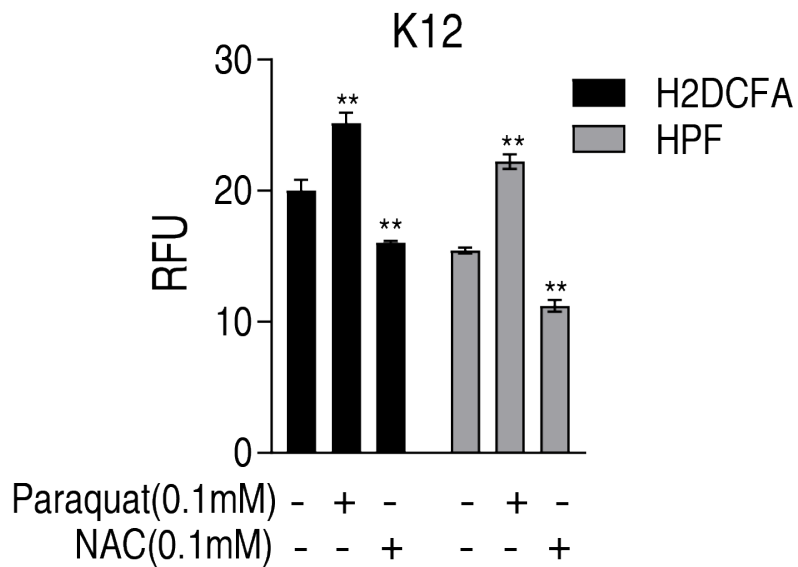

**Fig. S10 Evaluation of ROS-reactive dyes H2DCFA and HPF via promoter and inhibitor in K12.** Promoter paraquat and inhibitor N-acetylcysteine were used positive and negative controls to ascertain the two probes. Correspondingly, RFU of H2DCFA and HPF was promoted and inhibited by paraquat and N-acetylcysteine. Results are displayed as mean  $\pm$  SEM, and statistically significant differences are identified by Kruskal–Wallis followed by Dunn’s multiple comparison post hoc test. \*\*,  $P < 0.01$ .

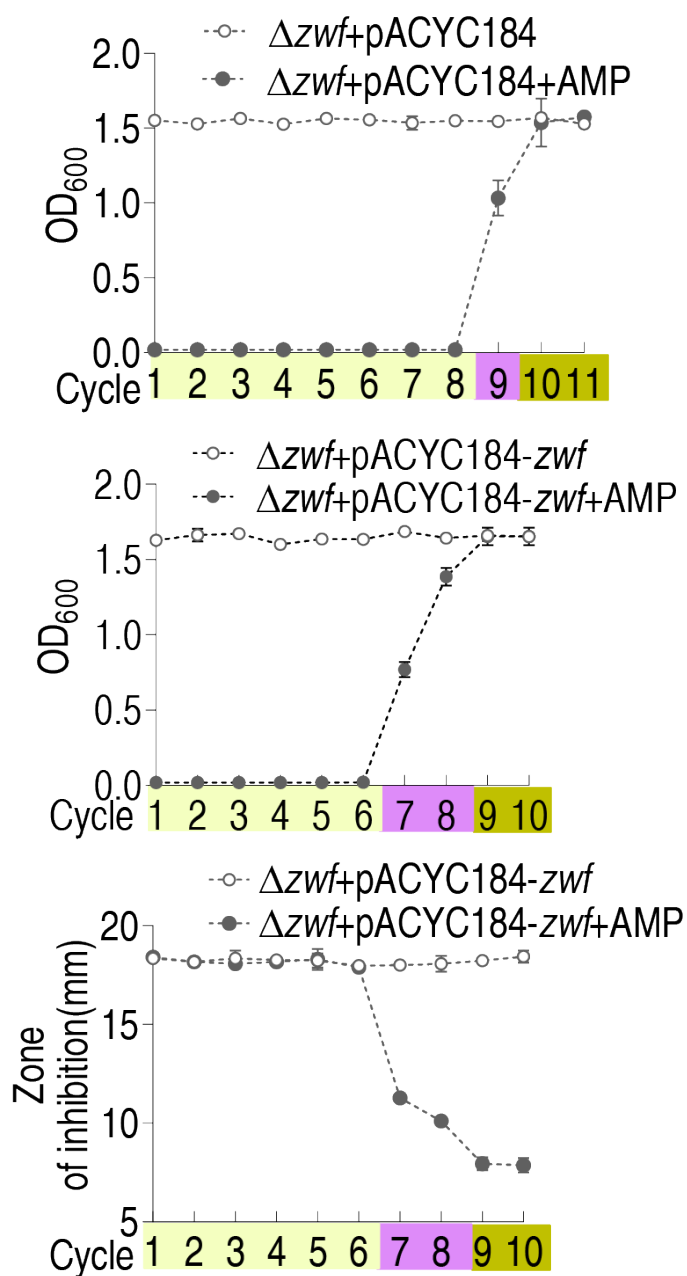

**Fig. S11 Growth/viability of  $\Delta zwf$ -pACYC184 cells (upper) and  $\Delta zwf$ -pACYC184-*zwf* cells (middle) and MIC of  $\Delta zwf$ -pACYC184-*zwf* cells (lower) were estimated from OD<sub>600</sub> and zone, respectively, after indicated number of cycles of exposure to ampicillin. Bacteria are treated using 100  $\mu$ g/mL ampicillin for 4.5 h and then grown at 37 °C for 16h.  $\Delta zwf$ -pACYC184 + AMP, with ampicillin;  $\Delta zwf$ -pACYC184, without ampicillin.**

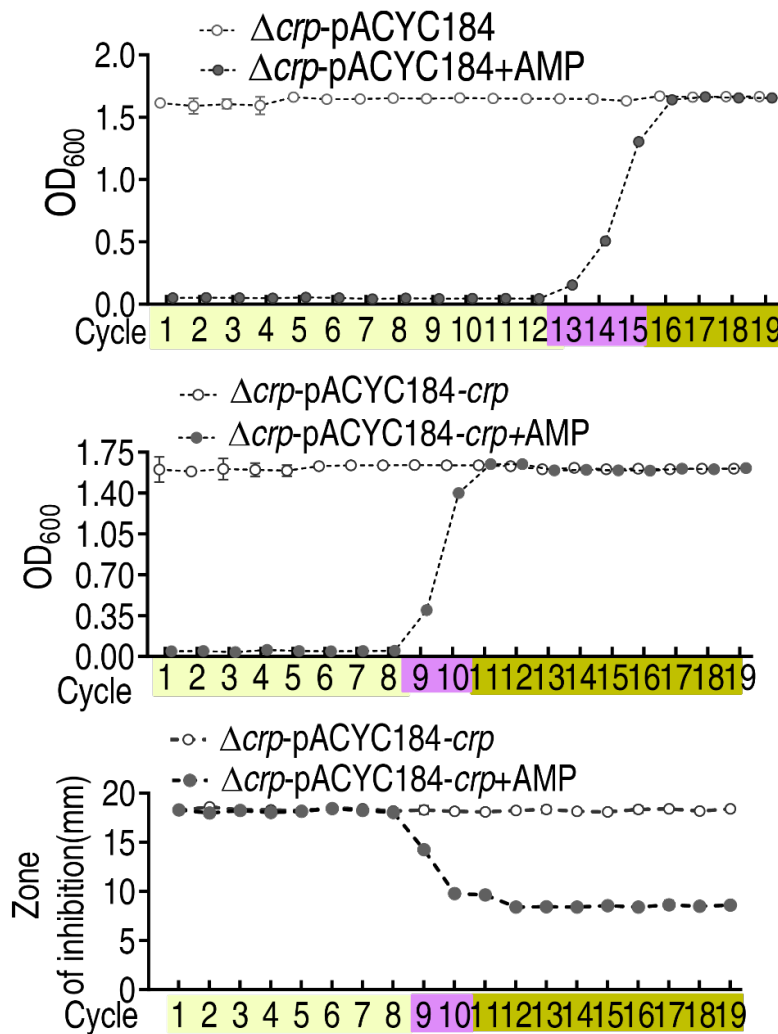

**Fig. S12 Growth/viability of  $\Delta crp$ -pACYC184 cells (upper) and  $\Delta crp$ -pACYC184-*crp* cells (middle) and MIC of  $\Delta crp$ -pACYC184-*crp* cells (lower) were estimated from OD<sub>600</sub> and zone, respectively, after indicated number of cycles of exposure to ampicillin. Bacteria are treated using 100  $\mu$ g/mL ampicillin for 4.5 h and then grown at 37 °C for 16h.  $\Delta crp$ -pACYC184 + AMP, with ampicillin;  $\Delta crp$ -pACYC184, without ampicillin.**

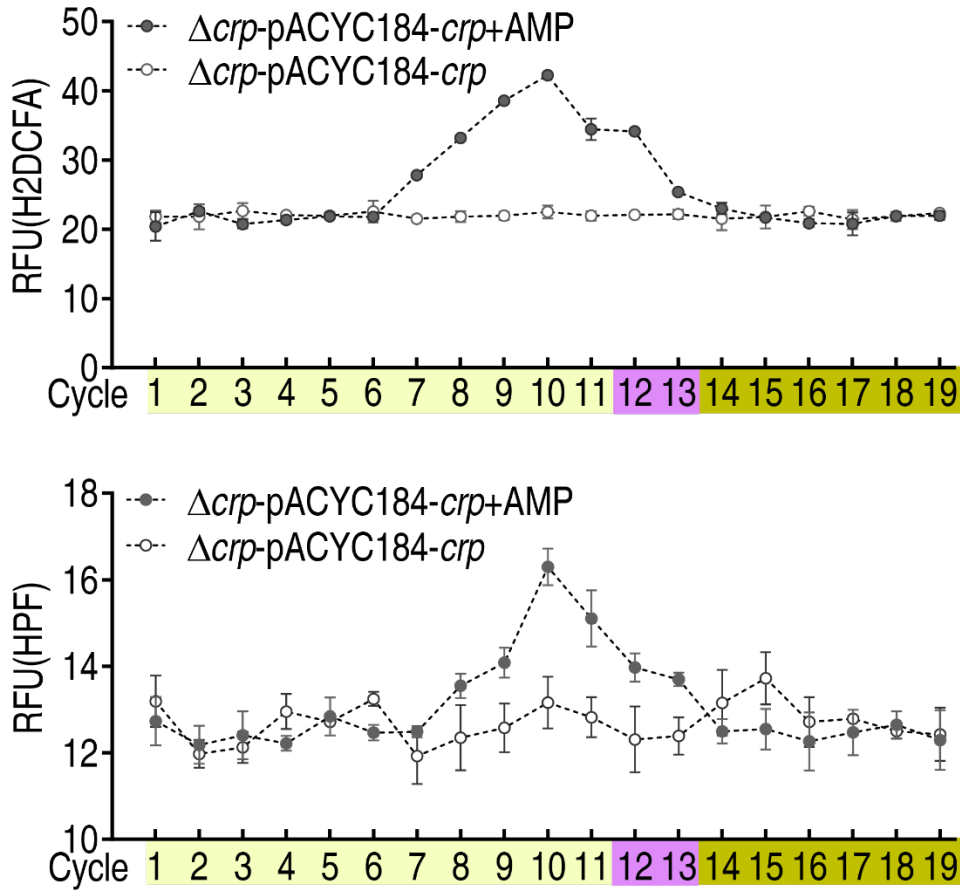

**Fig. S13 ROS of  $\Delta crp$  plus vector control in the presence or absence of ampicillin.** Bacteria are treated using 100  $\mu\text{g}/\text{mL}$  ampicillin for 4.5 h and then grown at 37  $^{\circ}\text{C}$  for 16h.  $\Delta crp$ -pACYC184 + AMP, with ampicillin;  $\Delta crp$ -pACYC184, without ampicillin.

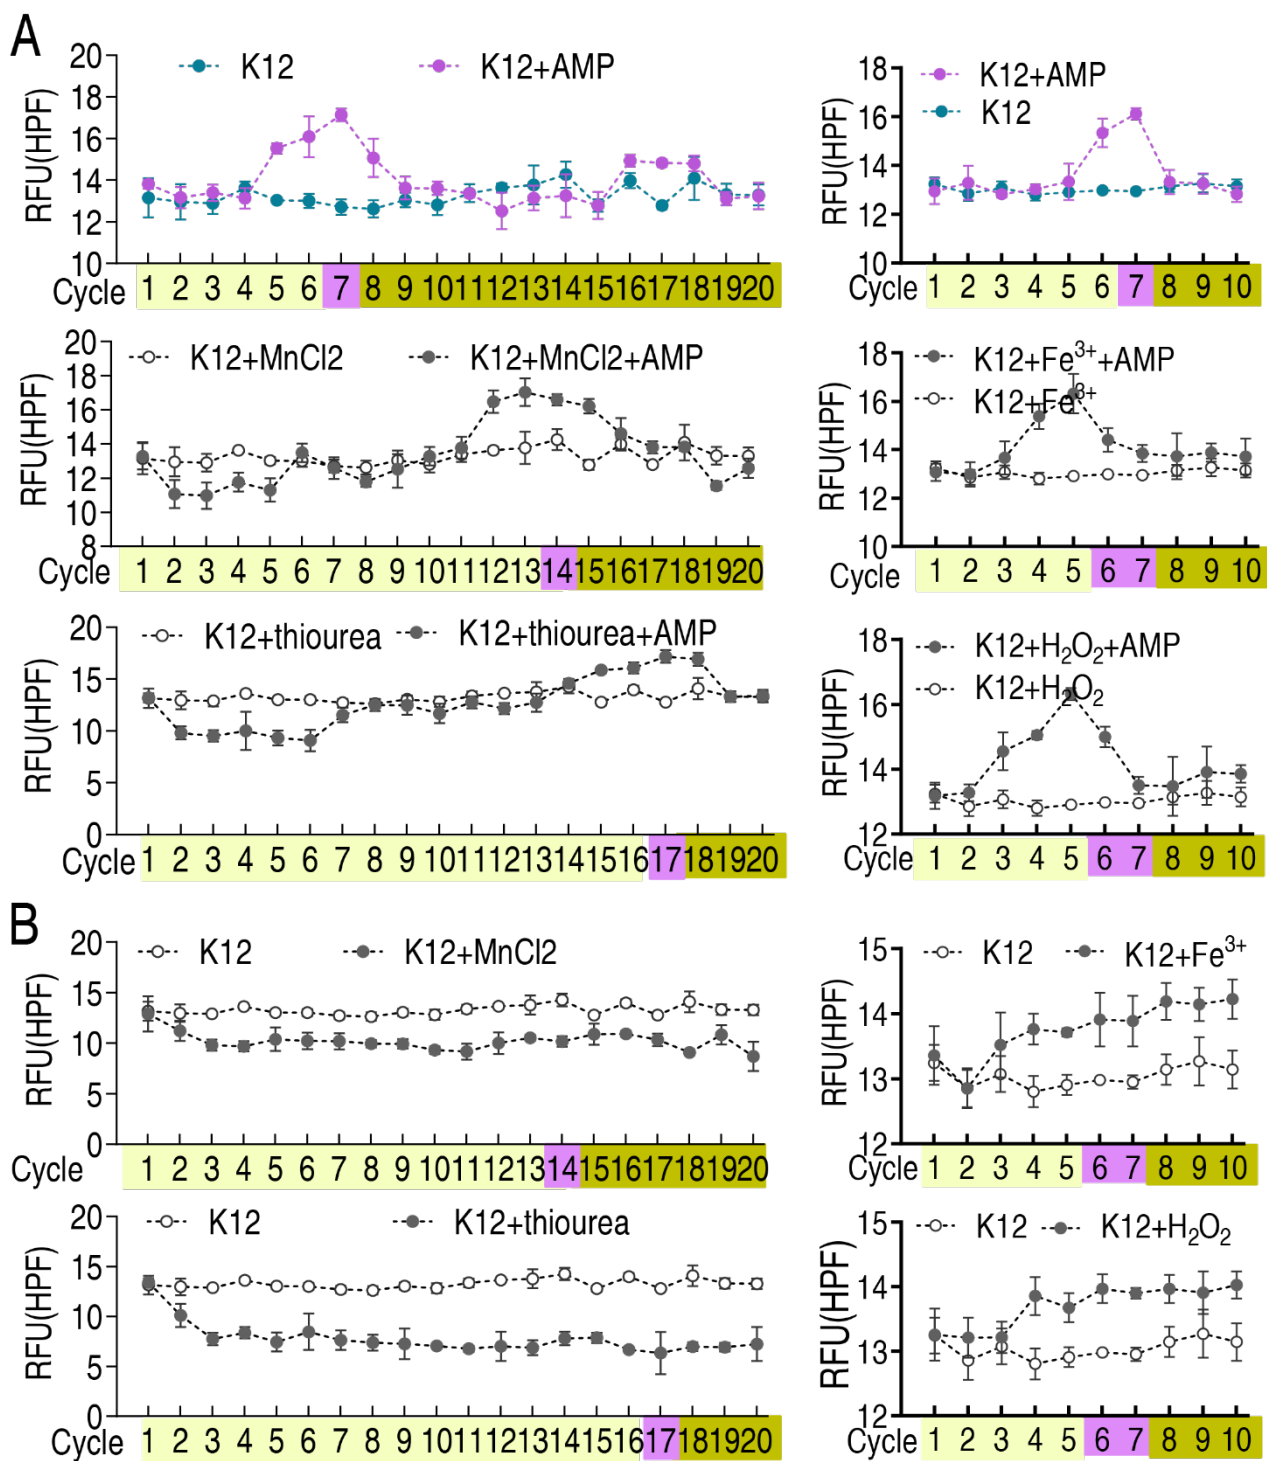

**Fig. S14. ROS of K12 exposed to MnCl<sub>2</sub>, thiourea (A), FeCl<sub>3</sub> or H<sub>2</sub>O<sub>2</sub> (B) in the presence or absence of ampicillin.** Bacteria are treated using 100 μg/mL ampicillin for 4.5 h and then grown at 37 °C for 16h.

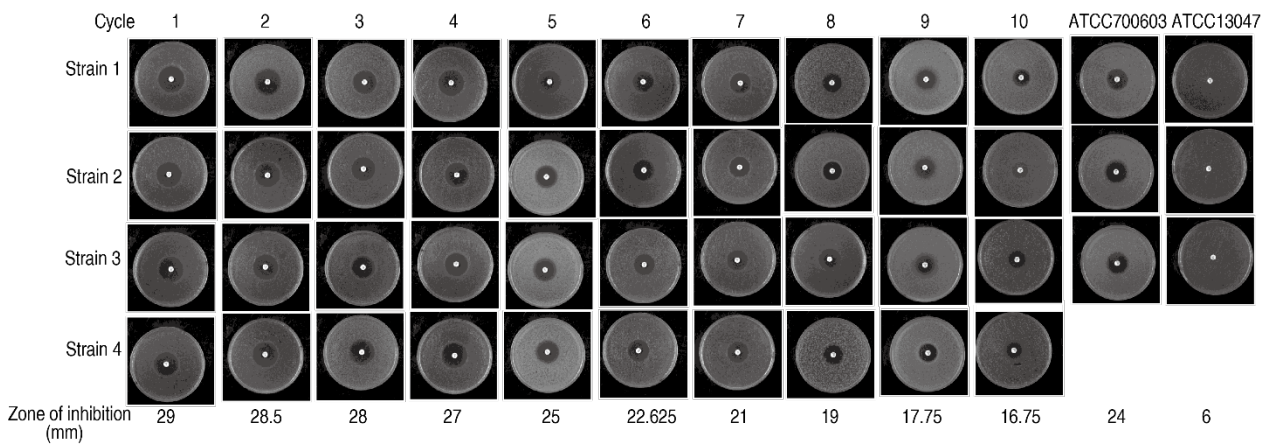

**Fig. S15 Activity of AmpC in the evolutionary cycle using susceptibility test disks (Oxoid), according to 2010 CLSI guidelines.** Bacteria cultured in 0.625 µg/mL ampicillin at 37 °C for 16 h were adjusted to a 0.5 McFarland standard. These bacteria were uniformly inoculated with Mueller-Hinton agar and then a 30 µg cefoxitin disk was placed at the center of the disk. After overnight incubation at 37 °C, zone of inhibition was detected. Zone of inhibition 18 was defined as a positive threshold. *Klebsiella pneumoniae* ATCC700603 and *Enterobacter cloacae* ATCC13047 were used as negative and positive controls, respectively.



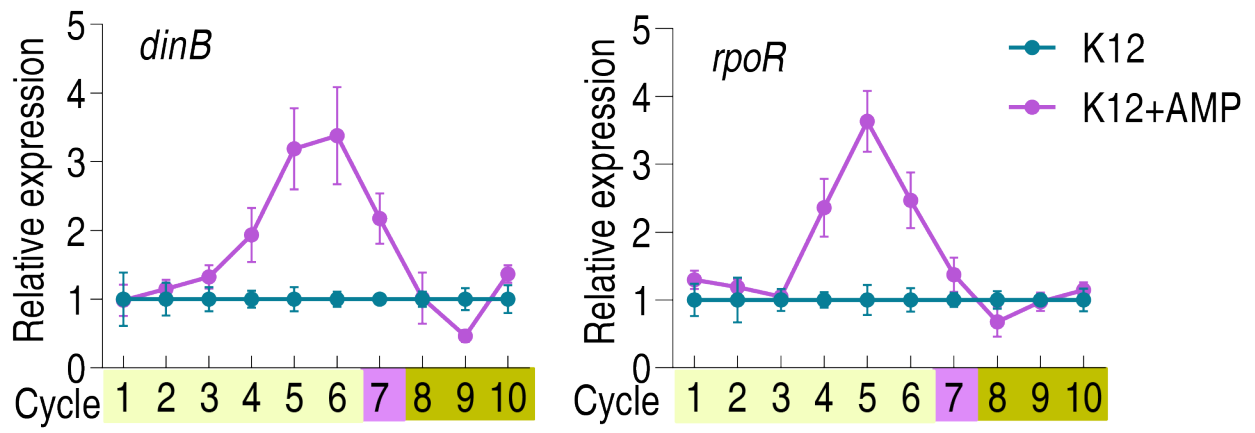

**Fig. S16** qRT-PCR for expression of *rpoS* and *dinB* in the evolutionary cycle.

A

| Site    | Number sample | Variation_type                 | Gene        | Gene_ID      | Mutation_c       | Mutation_p       | Presence | Proportion         |
|---------|---------------|--------------------------------|-------------|--------------|------------------|------------------|----------|--------------------|
| 190570  | 1             | missense_variant               | <i>dxr</i>  | BW25113_0173 | 563G>C           | Gly188Ala        | 2        | 1/20               |
| 442807  | 1             | LOF                            | <i>cyoE</i> | BW25113_0428 | --               | --               | 9        | 1/20               |
| 444022  | 1             | missense_variant               | <i>cyoC</i> | BW25113_0430 | 95A>G            | Tyr32Cys         | 4        | 1/20               |
| 444023  | 1             | missense_variant               | <i>cyoC</i> | BW25113_0430 | 94T>C            | Tyr32His         | 4        | 1/20               |
| 444026  | 1             | missense_variant               | <i>cyoC</i> | BW25113_0430 | 91A>T            | Ile31Phe         | 4        | 1/20               |
| 494641  | 1             | synonymous_variant             | <i>aes</i>  | BW25113_0476 | 789G>A           | Pro263Pro        | 2        | 1/20               |
| 550208  | 5             | missense_variant               | <i>cysS</i> | BW25113_0526 | 142G>A           | Asp48Asn         | 6        | 5/20               |
| 1368466 | 179           | synonymous_variant             | <i>ycjP</i> | BW25113_1312 | 120G>A           | Lys40Lys         | all      | full               |
| 1613605 | 1             | missense_variant               | <i>marR</i> | BW25113_1530 | 229C>A           | Arg77Ser         | 6        | 1/20               |
| 1649891 | 1             | missense_variant               | <i>ynfA</i> | BW25113_1582 | 40T>A            | Cys14Ser         | 4        | 1/20               |
| 2236298 | 1             | missense_variant               | <i>yeiB</i> | BW25113_2152 | 149G>T           | Trp50Leu         | 4        | 1/20               |
| 2922492 | 2             | missense_variant               | <i>sdaC</i> | BW25113_2796 | 905C>T           | Ala302Val        | 5        | 2/20               |
| 3493210 | 1             | upstream_gene_variant          | <i>frlA</i> | BW25113_3370 | -59C>T           | --               | 9        | 1/20               |
| 3521411 | 1             | missense_variant               | <i>yrfF</i> | BW25113_3398 | 1584C>A          | Asn528Lys        | 4        | 1/20               |
| 3528780 | 1             | missense_variant               | <i>envZ</i> | BW25113_3404 | 448A>C           | Thr150Pro        | 8        | 1/20               |
| 3528809 | 42            | missense_variant               | <i>envZ</i> | BW25113_3404 | 419C>T           | Ser140Leu        | 7, 8, 9  | 3/20, 19/20, 20/20 |
| 3529300 | 6             | missense_variant               | <i>ompF</i> | BW25113_3405 | 644A>G           | Asp215Gly        | 7        | 6/20               |
| 3621421 | 1             | missense_variant               | <i>rbbA</i> | BW25113_3486 | 1478A>T          | Glu493Val        | 4        | 1/20               |
| 3751903 | 1             | missense_variant               | <i>selB</i> | BW25113_3590 | 1319C>T          | Pro440Leu        | 1        | 1/20               |
| 3846511 | 1             | ncRNA_variant                  | <i>istR</i> | BW25113_4616 | --               | --               | 4        | 1/20               |
| 3921357 | 1             | synonymous_variant             | <i>asnA</i> | BW25113_3744 | 843G>A           | Ala281Ala        | 6        | 1/20               |
| 3965390 | 1             | conservative_inframe_insertion | <i>wecC</i> | BW25113_3787 | 778_783dupCCTGGC | Pro260_Gly261dup | 7        | 1/20               |
| 4010877 | 1             | missense_variant               | <i>rmuC</i> | BW25113_3832 | 185G>A           | Cys62Tyr         | 3        | 1/19               |
| 4094336 | 1             | missense_variant               | <i>cpxA</i> | BW25113_3911 | 568G>A           | Ala190Thr        | 8        | 1/20               |
| 4094834 | 1             | conservative_inframe_deletion  | <i>cpxA</i> | BW25113_3911 | 64_69delATGTTG   | Met22_Leu23del   | 8        | 1/20               |
| 4431404 | 1             | missense_variant               | <i>msrA</i> | BW25113_4219 | 590G>A           | Gly197Asp        | 5        | 1/20               |
| 4544972 | 1             | missense_variant               | <i>uxuR</i> | BW25113_4324 | 580C>A           | Arg194Ser        | 1        | 1/20               |

B

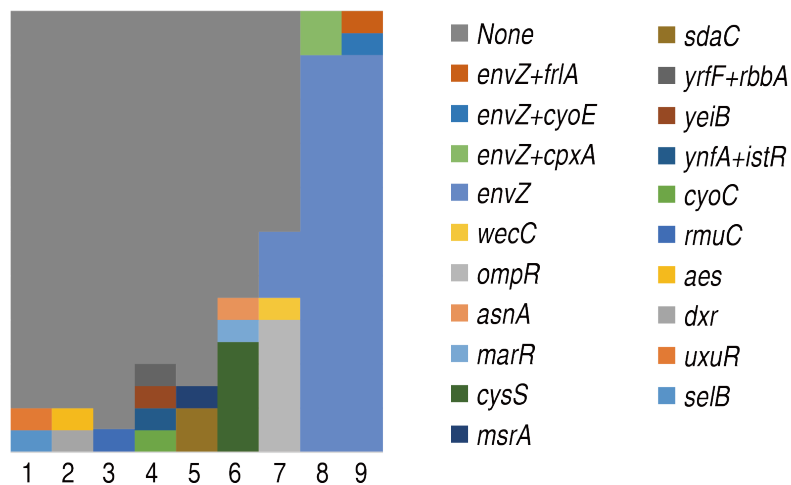

**Fig. S17 Whole genome sequencing and bioinformatics analysis.** *E. coli* BW25113 cells with and without ampicillin were cycled for 9 cycles. A total of 20 clones with ampicillin and 3 clones without ampicillin each cycle were collected. Whole genome was sequenced by Biomarker Technologies (Beijing, China) with Illumina platforms, yielding 206 data sets (one absent in third cycle with ampicillin). A total 27 mutations involved in 23 genes were found. Among these

mutations, mutation of *ycjP* (site1368466) was determined in every sample, which was estimated to be a difference site in the primary bacteria relative to the reference genome itself, so this site was excluded in the subsequent analysis. The other 26 mutations involved in the other 22 genes were identified only in samples with ampicillin. Specifically, only mutations in *envZ* (working for two-component system) were detected continuously in the 7<sup>th</sup>, 8<sup>th</sup>, and 9<sup>th</sup> cycles. Mutations in the other genes were detected only in one cycle and not in the others. *envZ* had 3 mutations in 20 clones in the 7<sup>th</sup> cycle and all of the 20 clones in the 8<sup>th</sup> and 9<sup>th</sup> cycles had mutations, among which one clone in the 8<sup>th</sup> cycle had mutation at 3528780, and the other clones had mutations at 3528809. In addition to *envZ* mutations, *envZ + cyoE* (the 9<sup>th</sup> cycle; *cyoE* works for electron transport chain), *envZ + frlA* (the 9<sup>th</sup> cycle; *frlA* works for fructose lysine transporter) and *envZ + cpxA* (the 8<sup>th</sup> cycle; *cpxA* works for two-component system) appeared simultaneously in the 8-9<sup>th</sup> cycles. (A) The mutant genes and species. (B) Graph showing these mutated genes related to the evolutionary cycle.

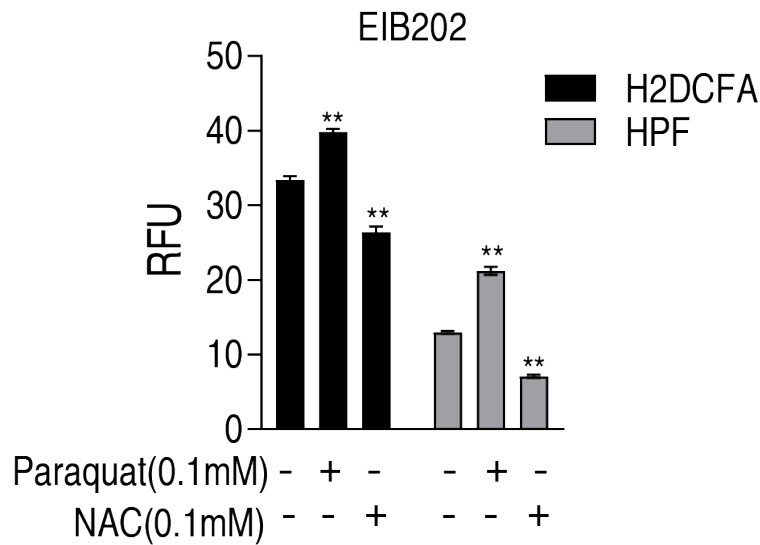

**Fig. S18 Evaluation of ROS-reactive dyes H2DCFA and HPF in via promoter and inhibitor *E. tarda*.** Promoter and inhibitor N-acetylcysteine were used positive and negative controls to ascertain the two probes. Correspondingly, RFU of H2DCFA and HPF was promoted and inhibited by paraquat and N-acetylcysteine. Results are displayed as mean  $\pm$  SEM, and statistically significant differences are identified by Kruskal–Wallis followed by Dunn’s multiple comparison post hoc test. \*\*,  $P < 0.01$ .

**Table S1 MIC list on cells of the evolutionary cycle, measured by the Oxford cup method**

**K12**

| Strain(Cycle)     | MIC  | Strain(Cycle)          | MIC  | Strain(Cycle)                          | MIC  | Strain(Cycle)                              | MIC  |
|-------------------|------|------------------------|------|----------------------------------------|------|--------------------------------------------|------|
| K12(1)            | 18   | K12+AMP(1)             | 18.1 | K12+glucose(1)                         | 20.1 | K12+glucose+AMP(1)                         | 20   |
| K12(2)            | 18.2 | K12+AMP(2)             | 17.9 | K12+glucose(2)                         | 19.9 | K12+glucose+AMP(2)                         | 20.1 |
| K12(3)            | 18   | K12+AMP(3)             | 18.1 | K12+glucose(3)                         | 20   | K12+glucose+AMP(3)                         | 19.9 |
| K12(4)            | 17.9 | K12+AMP(4)             | 18   | K12+glucose(4)                         | 20.1 | K12+glucose+AMP(4)                         | 20.4 |
| K12(5)            | 18   | K12+AMP(5)             | 18   | K12+glucose(5)                         | 20   | K12+glucose+AMP(5)                         | 20   |
| K12(6)            | 17.9 | K12+AMP(6)             | 18   | K12+glucose(6)                         | 20.1 | K12+glucose+AMP(6)                         | 20.1 |
| K12(7)            | 18.1 | K12+AMP(7)             | 9.9  | K12+glucose(7)                         | 20.1 | K12+glucose+AMP(7)                         | 20.1 |
| K12(8)            | 18   | K12+AMP(8)             | 8.4  | K12+glucose(8)                         | 20.1 | K12+glucose+AMP(8)                         | 20.1 |
| K12(9)            | 17.9 | K12+AMP(9)             | 8.5  | K12+glucose(9)                         | 20.3 | K12+glucose+AMP(9)                         | 20.1 |
| K12(10)           | 18   | K12+AMP(10)            | 8.5  | K12+glucose(10)                        | 19.9 | K12+glucose+AMP(10)                        | 19.7 |
| $\Delta aceE(1)$  | 16.6 | $\Delta aceE$ +AMP(1)  | 16.5 | K12+glucose(11)                        | 19.9 | K12+glucose+AMP(11)                        | 20.1 |
| $\Delta aceE(2)$  | 16.3 | $\Delta aceE$ +AMP(2)  | 16.8 | K12+glucose(12)                        | 20.2 | K12+glucose+AMP(12)                        | 13.6 |
| $\Delta aceE(3)$  | 16.5 | $\Delta aceE$ +AMP(3)  | 16.5 | K12+glucose(13)                        | 20.1 | K12+glucose+AMP(13)                        | 8.7  |
| $\Delta aceE(4)$  | 16.3 | $\Delta aceE$ +AMP(4)  | 16.6 | K12+glucose(14)                        | 19.9 | K12+glucose+AMP(14)                        | 8.5  |
| $\Delta aceE(5)$  | 16.7 | $\Delta aceE$ +AMP(5)  | 16.7 | K12+glucose(15)                        | 20.1 | K12+glucose+AMP(15)                        | 8.3  |
| $\Delta aceE(6)$  | 16.5 | $\Delta aceE$ +AMP(6)  | 16.4 | K12+H <sub>2</sub> O <sub>2</sub> (1)  | 18.2 | K12+H <sub>2</sub> O <sub>2</sub> +AMP(1)  | 17.8 |
| $\Delta aceE(7)$  | 16.5 | $\Delta aceE$ +AMP(7)  | 16.6 | K12+H <sub>2</sub> O <sub>2</sub> (2)  | 17.8 | K12+H <sub>2</sub> O <sub>2</sub> +AMP(2)  | 18.1 |
| $\Delta aceE(8)$  | 16.6 | $\Delta aceE$ +AMP(8)  | 16.4 | K12+H <sub>2</sub> O <sub>2</sub> (3)  | 18.1 | K12+H <sub>2</sub> O <sub>2</sub> +AMP(3)  | 18   |
| $\Delta aceE(9)$  | 16.5 | $\Delta aceE$ +AMP(9)  | 16.5 | K12+H <sub>2</sub> O <sub>2</sub> (4)  | 18   | K12+H <sub>2</sub> O <sub>2</sub> +AMP(4)  | 17.9 |
| $\Delta aceE(10)$ | 16.4 | $\Delta aceE$ +AMP(10) | 16.7 | K12+H <sub>2</sub> O <sub>2</sub> (5)  | 17.8 | K12+H <sub>2</sub> O <sub>2</sub> +AMP(5)  | 18   |
| $\Delta aceE(11)$ | 16.7 | $\Delta aceE$ +AMP(11) | 16.9 | K12+H <sub>2</sub> O <sub>2</sub> (6)  | 17.9 | K12+H <sub>2</sub> O <sub>2</sub> +AMP(6)  | 12.2 |
| $\Delta aceE(12)$ | 16.7 | $\Delta aceE$ +AMP(12) | 16.5 | K12+H <sub>2</sub> O <sub>2</sub> (7)  | 17.8 | K12+H <sub>2</sub> O <sub>2</sub> +AMP(7)  | 8.6  |
| $\Delta aceE(13)$ | 16.6 | $\Delta aceE$ +AMP(13) | 16.4 | K12+H <sub>2</sub> O <sub>2</sub> (8)  | 17.8 | K12+H <sub>2</sub> O <sub>2</sub> +AMP(8)  | 7.9  |
| $\Delta aceE(14)$ | 16.5 | $\Delta aceE$ +AMP(14) | 16.5 | K12+H <sub>2</sub> O <sub>2</sub> (9)  | 18.1 | K12+H <sub>2</sub> O <sub>2</sub> +AMP(9)  | 8.2  |
| $\Delta aceE(15)$ | 16.6 | $\Delta aceE$ +AMP(15) | 16.8 | K12+H <sub>2</sub> O <sub>2</sub> (10) | 17.9 | K12+H <sub>2</sub> O <sub>2</sub> +AMP(10) | 7.8  |
| $\Delta aceE(16)$ | 16.5 | $\Delta aceE$ +AMP(16) | 10.2 | K12+H <sub>2</sub> O <sub>2</sub> (11) | 18.3 | K12+H <sub>2</sub> O <sub>2</sub> +AMP(11) | 8.1  |
| $\Delta aceE(17)$ | 16.5 | $\Delta aceE$ +AMP(17) | 8.6  | K12+Fe <sup>3+</sup> (1)               | 17.7 | K12+Fe <sup>3+</sup> +AMP(1)               | 18.1 |
| $\Delta aceE(18)$ | 16.5 | $\Delta aceE$ +AMP(18) | 8.6  | K12+Fe <sup>3+</sup> (2)               | 18   | K12+Fe <sup>3+</sup> +AMP(2)               | 17.9 |
| $\Delta aceE(19)$ | 16.4 | $\Delta aceE$ +AMP(19) | 8.5  | K12+Fe <sup>3+</sup> (3)               | 18   | K12+Fe <sup>3+</sup> +AMP(3)               | 18.1 |
| $\Delta crr(1)$   | 16.7 | $\Delta crr$ +AMP(1)   | 16.7 | K12+Fe <sup>3+</sup> (4)               | 18.2 | K12+Fe <sup>3+</sup> +AMP(4)               | 18.3 |
| $\Delta crr(2)$   | 16.7 | $\Delta crr$ +AMP(2)   | 16.3 | K12+Fe <sup>3+</sup> (5)               | 18   | K12+Fe <sup>3+</sup> +AMP(5)               | 18.3 |
| $\Delta crr(3)$   | 16.7 | $\Delta crr$ +AMP(3)   | 16.9 | K12+Fe <sup>3+</sup> (6)               | 18.1 | K12+Fe <sup>3+</sup> +AMP(6)               | 13.1 |
| $\Delta crr(4)$   | 16.6 | $\Delta crr$ +AMP(4)   | 16.6 | K12+Fe <sup>3+</sup> (7)               | 17.8 | K12+Fe <sup>3+</sup> +AMP(7)               | 8.4  |
| $\Delta crr(5)$   | 16.5 | $\Delta crr$ +AMP(5)   | 11.3 | K12+Fe <sup>3+</sup> (8)               | 18.1 | K12+Fe <sup>3+</sup> +AMP(8)               | 7.9  |
| $\Delta crr(6)$   | 16.4 | $\Delta crr$ +AMP(6)   | 8.4  | K12+Fe <sup>3+</sup> (9)               | 18.2 | K12+Fe <sup>3+</sup> +AMP(9)               | 8.3  |
| $\Delta crr(7)$   | 16.6 | $\Delta crr$ +AMP(7)   | 8.5  | K12+Fe <sup>3+</sup> (10)              | 18.2 | K12+Fe <sup>3+</sup> +AMP(10)              | 7.8  |
| $\Delta ptsH(1)$  | 16.9 | $\Delta ptsH$ +AMP(1)  | 17   | K12+Fe <sup>3+</sup> (11)              | 17.8 | K12+Fe <sup>3+</sup> +AMP(11)              | 8.2  |
| $\Delta ptsH(2)$  | 16.7 | $\Delta ptsH$ +AMP(2)  | 16.5 | K12+MnCl <sub>2</sub> (1)              | 18.1 | K12+MnCl <sub>2</sub> +AMP(1)              | 17.8 |
| $\Delta ptsH(3)$  | 16.6 | $\Delta ptsH$ +AMP(3)  | 16.4 | K12+MnCl <sub>2</sub> (2)              | 17.9 | K12+MnCl <sub>2</sub> +AMP(2)              | 18.2 |
| $\Delta ptsH(4)$  | 16.7 | $\Delta ptsH$ +AMP(4)  | 16.5 | K12+MnCl <sub>2</sub> (3)              | 18.3 | K12+MnCl <sub>2</sub> +AMP(3)              | 18.1 |
| $\Delta ptsH(5)$  | 16.8 | $\Delta ptsH$ +AMP(5)  | 11.1 | K12+MnCl <sub>2</sub> (4)              | 18   | K12+MnCl <sub>2</sub> +AMP(4)              | 17.7 |
| $\Delta ptsH(6)$  | 16.6 | $\Delta ptsH$ +AMP(6)  | 9.3  | K12+MnCl <sub>2</sub> (5)              | 17.9 | K12+MnCl <sub>2</sub> +AMP(5)              | 18.1 |
| $\Delta ptsH(7)$  | 16.4 | $\Delta ptsH$ +AMP(7)  | 8.3  | K12+MnCl <sub>2</sub> (6)              | 18   | K12+MnCl <sub>2</sub> +AMP(6)              | 18   |

|                  |      |                      |      |                                   |      |                                       |      |
|------------------|------|----------------------|------|-----------------------------------|------|---------------------------------------|------|
| $\Delta zwf(1)$  | 17.1 | $\Delta zwf+AMP(1)$  | 17.2 | K12+MnCl <sub>2</sub> (7)         | 17.9 | K12+MnCl <sub>2</sub> +AMP(7)         | 18.3 |
| $\Delta zwf(2)$  | 17   | $\Delta zwf+AMP(2)$  | 17.1 | K12+MnCl <sub>2</sub> (8)         | 17.7 | K12+MnCl <sub>2</sub> +AMP(8)         | 17.9 |
| $\Delta zwf(3)$  | 17.1 | $\Delta zwf+AMP(3)$  | 17.1 | K12+MnCl <sub>2</sub> (9)         | 17.8 | K12+MnCl <sub>2</sub> +AMP(9)         | 18.1 |
| $\Delta zwf(4)$  | 17.2 | $\Delta zwf+AMP(4)$  | 17.2 | K12+MnCl <sub>2</sub> (10)        | 18.3 | K12+MnCl <sub>2</sub> +AMP(10)        | 17.9 |
| $\Delta zwf(5)$  | 17.2 | $\Delta zwf+AMP(5)$  | 17.2 | K12+MnCl <sub>2</sub> (11)        | 18.2 | K12+MnCl <sub>2</sub> +AMP(11)        | 17.9 |
| $\Delta zwf(6)$  | 17.2 | $\Delta zwf+AMP(6)$  | 17.2 | K12+MnCl <sub>2</sub> (12)        | 17.7 | K12+MnCl <sub>2</sub> +AMP(12)        | 18.1 |
| $\Delta zwf(7)$  | 17.1 | $\Delta zwf+AMP(7)$  | 17.1 | K12+MnCl <sub>2</sub> (13)        | 18   | K12+MnCl <sub>2</sub> +AMP(13)        | 14.8 |
| $\Delta zwf(8)$  | 17.2 | $\Delta zwf+AMP(8)$  | 17.2 | K12+MnCl <sub>2</sub> (14)        | 18.2 | K12+MnCl <sub>2</sub> +AMP(14)        | 13.2 |
| $\Delta zwf(9)$  | 17   | $\Delta zwf+AMP(9)$  | 13.8 | K12+MnCl <sub>2</sub> (15)        | 18.1 | K12+MnCl <sub>2</sub> +AMP(15)        | 12.8 |
| $\Delta zwf(10)$ | 17.1 | $\Delta zwf+AMP(10)$ | 8.5  | K12+MnCl <sub>2</sub> (16)        | 17.9 | K12+MnCl <sub>2</sub> +AMP(16)        | 10.9 |
| $\Delta zwf(11)$ | 17.1 | $\Delta zwf+AMP(11)$ | 8.3  | K12+MnCl <sub>2</sub> (17)        | 18   | K12+MnCl <sub>2</sub> +AMP(17)        | 8.6  |
| $\Delta sodB(1)$ | 18   | $\Delta sodB+AMP(1)$ | 18.1 | K12+MnCl <sub>2</sub> (18)        | 18   | K12+MnCl <sub>2</sub> +AMP(18)        | 8.5  |
| $\Delta sodB(2)$ | 18.1 | $\Delta sodB+AMP(2)$ | 18.1 | K12+MnCl <sub>2</sub> (19)        | 17.9 | K12+MnCl <sub>2</sub> +AMP(19)        | 8.5  |
| $\Delta sodB(3)$ | 18.1 | $\Delta sodB+AMP(3)$ | 18.1 | K12+MnCl <sub>2</sub> (20)        | 18   | K12+MnCl <sub>2</sub> +AMP(20)        | 8.5  |
| $\Delta sodB(4)$ | 18   | $\Delta sodB+AMP(4)$ | 18.1 | K12+Thiourea(1)                   | 18   | K12+Thiourea+AMP(1)                   | 17.9 |
| $\Delta sodB(5)$ | 18   | $\Delta sodB+AMP(5)$ | 12   | K12+Thiourea(2)                   | 18.1 | K12+Thiourea+AMP(2)                   | 18   |
| $\Delta sodB(6)$ | 18   | $\Delta sodB+AMP(6)$ | 8.5  | K12+Thiourea(3)                   | 17.9 | K12+Thiourea+AMP(3)                   | 18.2 |
| $\Delta sodB(7)$ | 18.2 | $\Delta sodB+AMP(7)$ | 8.2  | K12+Thiourea(4)                   | 17.9 | K12+Thiourea+AMP(4)                   | 18.2 |
| $\Delta sodB(8)$ | 18.1 | $\Delta sodB+AMP(8)$ | 8.2  | K12+Thiourea(5)                   | 18   | K12+Thiourea+AMP(5)                   | 18   |
| $\Delta crp(1)$  | 17   | $\Delta crp+AMP(1)$  | 16.8 | K12+Thiourea(6)                   | 18   | K12+Thiourea+AMP(6)                   | 17.9 |
| $\Delta crp(2)$  | 16.8 | $\Delta crp+AMP(2)$  | 17.1 | K12+Thiourea(7)                   | 18.1 | K12+Thiourea+AMP(7)                   | 18.1 |
| $\Delta crp(3)$  | 17.2 | $\Delta crp+AMP(3)$  | 16.9 | K12+Thiourea(8)                   | 18.2 | K12+Thiourea+AMP(8)                   | 18   |
| $\Delta crp(4)$  | 17   | $\Delta crp+AMP(4)$  | 16.9 | K12+Thiourea(9)                   | 18   | K12+Thiourea+AMP(9)                   | 18.1 |
| $\Delta crp(5)$  | 17   | $\Delta crp+AMP(5)$  | 17.2 | K12+Thiourea(10)                  | 18   | K12+Thiourea+AMP(10)                  | 17.9 |
| $\Delta crp(6)$  | 17.1 | $\Delta crp+AMP(6)$  | 16.9 | K12+Thiourea(11)                  | 17.9 | K12+Thiourea+AMP(11)                  | 18.1 |
| $\Delta crp(7)$  | 16.8 | $\Delta crp+AMP(7)$  | 17.1 | K12+Thiourea(12)                  | 18   | K12+Thiourea+AMP(12)                  | 18.1 |
| $\Delta crp(8)$  | 17.1 | $\Delta crp+AMP(8)$  | 17.1 | K12+Thiourea(13)                  | 18   | K12+Thiourea+AMP(13)                  | 18.1 |
| $\Delta crp(9)$  | 16.9 | $\Delta crp+AMP(9)$  | 17   | K12+Thiourea(14)                  | 18.2 | K12+Thiourea+AMP(14)                  | 17.9 |
| $\Delta crp(10)$ | 17   | $\Delta crp+AMP(10)$ | 17.1 | K12+Thiourea(15)                  | 18.1 | K12+Thiourea+AMP(15)                  | 17.8 |
| $\Delta crp(11)$ | 16.9 | $\Delta crp+AMP(11)$ | 17.1 | K12+Thiourea(16)                  | 18.1 | K12+Thiourea+AMP(16)                  | 18   |
| $\Delta crp(12)$ | 17.3 | $\Delta crp+AMP(12)$ | 14.9 | K12+Thiourea(17)                  | 17.9 | K12+Thiourea+AMP(17)                  | 13.8 |
| $\Delta crp(13)$ | 17   | $\Delta crp+AMP(13)$ | 9.6  | K12+Thiourea(18)                  | 17.9 | K12+Thiourea+AMP(18)                  | 8.6  |
| $\Delta crp(14)$ | 17.1 | $\Delta crp+AMP(14)$ | 8.6  | K12+Thiourea(19)                  | 17.8 | K12+Thiourea+AMP(19)                  | 8.6  |
| $\Delta crp(15)$ | 16.9 | $\Delta crp+AMP(15)$ | 8.5  | K12+Thiourea(20)                  | 17.7 | K12+Thiourea+AMP(20)                  | 8.5  |
| $\Delta crp(16)$ | 16.8 | $\Delta crp+AMP(16)$ | 8.5  | $\Delta crp$ -pACYC184- $crp(1)$  | 18.3 | $\Delta crp$ -pACYC184- $crp+AMP(1)$  | 18.3 |
| $\Delta crp(17)$ | 17.1 | $\Delta crp+AMP(17)$ | 8.5  | $\Delta crp$ -pACYC184- $crp(2)$  | 18.6 | $\Delta crp$ -pACYC184- $crp+AMP(2)$  | 18   |
| $\Delta crp(18)$ | 17.2 | $\Delta crp+AMP(18)$ | 8.4  | $\Delta crp$ -pACYC184- $crp(3)$  | 18.3 | $\Delta crp$ -pACYC184- $crp+AMP(3)$  | 18.3 |
| $\Delta crp(19)$ | 17   | $\Delta crp+AMP(19)$ | 8.7  | $\Delta crp$ -pACYC184- $crp(4)$  | 18.3 | $\Delta crp$ -pACYC184- $crp+AMP(4)$  | 18.1 |
|                  |      |                      |      | $\Delta crp$ -pACYC184- $crp(5)$  | 18.3 | $\Delta crp$ -pACYC184- $crp+AMP(5)$  | 18.2 |
|                  |      |                      |      | $\Delta crp$ -pACYC184- $crp(6)$  | 18.5 | $\Delta crp$ -pACYC184- $crp+AMP(6)$  | 18.5 |
|                  |      |                      |      | $\Delta crp$ -pACYC184- $crp(7)$  | 18.4 | $\Delta crp$ -pACYC184- $crp+AMP(7)$  | 18.3 |
|                  |      |                      |      | $\Delta crp$ -pACYC184- $crp(8)$  | 18.2 | $\Delta crp$ -pACYC184- $crp+AMP(8)$  | 18.1 |
|                  |      |                      |      | $\Delta crp$ -pACYC184- $crp(9)$  | 18.3 | $\Delta crp$ -pACYC184- $crp+AMP(9)$  | 14.3 |
|                  |      |                      |      | $\Delta crp$ -pACYC184- $crp(10)$ | 18.2 | $\Delta crp$ -pACYC184- $crp+AMP(10)$ | 9.8  |
|                  |      |                      |      | $\Delta crp$ -pACYC184- $crp(11)$ | 18.1 | $\Delta crp$ -pACYC184- $crp+AMP(11)$ | 9.7  |
|                  |      |                      |      | $\Delta crp$ -pACYC184- $crp(12)$ | 18.3 | $\Delta crp$ -pACYC184- $crp+AMP(12)$ | 8.4  |
|                  |      |                      |      | $\Delta crp$ -pACYC184- $crp(13)$ | 18.4 | $\Delta crp$ -pACYC184- $crp+AMP(13)$ | 8.5  |

|                                         |      |                                             |     |
|-----------------------------------------|------|---------------------------------------------|-----|
| $\Delta crp$ -pACYC184- <i>crp</i> (14) | 18.2 | $\Delta crp$ -pACYC184- <i>crp</i> +AMP(14) | 8.4 |
| $\Delta crp$ -pACYC184- <i>crp</i> (15) | 18.1 | $\Delta crp$ -pACYC184- <i>crp</i> +AMP(15) | 8.6 |
| $\Delta crp$ -pACYC184- <i>crp</i> (16) | 18.4 | $\Delta crp$ -pACYC184- <i>crp</i> +AMP(16) | 8.4 |
| $\Delta crp$ -pACYC184- <i>crp</i> (17) | 18.4 | $\Delta crp$ -pACYC184- <i>crp</i> +AMP(17) | 8.7 |
| $\Delta crp$ -pACYC184- <i>crp</i> (18) | 18.2 | $\Delta crp$ -pACYC184- <i>crp</i> +AMP(18) | 8.5 |
| $\Delta crp$ -pACYC184- <i>crp</i> (19) | 18.4 | $\Delta crp$ -pACYC184- <i>crp</i> +AMP(19) | 8.6 |

## EIB202

| Strain(Cycle) | MIC  | Strain(Cycle)  | MIC  | Strain(Cycle)     | MIC  | Strain(Cycle)         | MIC  |
|---------------|------|----------------|------|-------------------|------|-----------------------|------|
| EIB202(1)     | 17.5 | EIB202+AMP(1)  | 17.6 | $\Delta ptsH$ (1) | 17.9 | $\Delta ptsH$ +AMP(1) | 18.1 |
| EIB202(2)     | 17.8 | EIB203+AMP(2)  | 17.4 | $\Delta ptsH$ (2) | 17.9 | $\Delta ptsH$ +AMP(2) | 17.7 |
| EIB202(3)     | 17.5 | EIB204+AMP(3)  | 17.6 | $\Delta ptsH$ (3) | 17.8 | $\Delta ptsH$ +AMP(3) | 17.9 |
| EIB202(4)     | 17.6 | EIB205+AMP(4)  | 17.6 | $\Delta ptsH$ (4) | 17.7 | $\Delta ptsH$ +AMP(4) | 17.8 |
| EIB202(5)     | 17.5 | EIB206+AMP(5)  | 17.6 | $\Delta ptsH$ (5) | 17.9 | $\Delta ptsH$ +AMP(5) | 17.8 |
| EIB202(6)     | 17.7 | EIB207+AMP(6)  | 17.5 | $\Delta ptsH$ (6) | 17.6 | $\Delta ptsH$ +AMP(6) | 17.9 |
| EIB202(7)     | 17.1 | EIB208+AMP(7)  | 17.5 | $\Delta ptsH$ (7) | 18   | $\Delta ptsH$ +AMP(7) | 13.8 |
| EIB202(8)     | 17.3 | EIB209+AMP(8)  | 17.3 | $\Delta ptsH$ (8) | 17.6 | $\Delta ptsH$ +AMP(8) | 9.2  |
| EIB202(9)     | 17.5 | EIB210+AMP(9)  | 9.5  | $\Delta ptsH$ (9) | 17.8 | $\Delta ptsH$ +AMP(9) | 8.8  |
| EIB202(10)    | 17.5 | EIB211+AMP(10) | 8.2  | $\Delta crr$ (1)  | 17.2 | $\Delta crr$ +AMP(1)  | 17   |
| EIB202(11)    | 17.4 | EIB212+AMP(11) | 8.1  | $\Delta crr$ (2)  | 16.7 | $\Delta crr$ +AMP(2)  | 17   |
| EIB202(12)    | 17.4 | EIB213+AMP(12) | 8.4  | $\Delta crr$ (3)  | 17.1 | $\Delta crr$ +AMP(3)  | 16.9 |
|               |      |                |      | $\Delta crr$ (4)  | 17.1 | $\Delta crr$ +AMP(4)  | 17.1 |
|               |      |                |      | $\Delta crr$ (5)  | 17   | $\Delta crr$ +AMP(5)  | 16.9 |
|               |      |                |      | $\Delta crr$ (6)  | 17.1 | $\Delta crr$ +AMP(6)  | 11.3 |
|               |      |                |      | $\Delta crr$ (7)  | 16.8 | $\Delta crr$ +AMP(7)  | 9.6  |
|               |      |                |      | $\Delta crr$ (8)  | 17.1 | $\Delta crr$ +AMP(8)  | 9    |

## S2

| Strain(Cycle) | MIC  | Strain(Cycle) | MIC  | Strain(Cycle)                    | MIC  | Strain(Cycle)                        | MIC  |
|---------------|------|---------------|------|----------------------------------|------|--------------------------------------|------|
| S2(1)         | 17.6 | S2+AMP(1)     | 17.4 | S2 <i>pts</i> promotor delete(1) | 16.6 | S2 <i>pts</i> promotor delete+AMP(1) | 16.5 |
| S2(2)         | 17.5 | S3+AMP(2)     | 17.9 | S2 <i>pts</i> promotor delete(2) | 16.5 | S2 <i>pts</i> promotor delete+AMP(2) | 16.6 |
| S2(3)         | 18.1 | S4+AMP(3)     | 17.6 | S2 <i>pts</i> promotor delete(3) | 16.8 | S2 <i>pts</i> promotor delete+AMP(3) | 16.8 |
| S2(4)         | 17.9 | S5+AMP(4)     | 18   | S2 <i>pts</i> promotor delete(4) | 16.8 | S2 <i>pts</i> promotor delete+AMP(4) | 16.8 |
| S2(5)         | 18.1 | S6+AMP(5)     | 17.9 | S2 <i>pts</i> promotor delete(5) | 16.8 | S2 <i>pts</i> promotor delete+AMP(5) | 14.6 |

|        |      |             |      |                                   |      |                                       |      |
|--------|------|-------------|------|-----------------------------------|------|---------------------------------------|------|
| S2(6)  | 17.9 | S7+AMP(6)   | 17.6 | S2 <i>pts</i> promotor delete(6)  | 16.7 | S2 <i>pts</i> promotor delete+AMP(6)  | 14.2 |
| S2(7)  | 18   | S8+AMP(7)   | 17.9 | S2 <i>pts</i> promotor delete(7)  | 16.7 | S2 <i>pts</i> promotor delete+AMP(7)  | 13.6 |
| S2(8)  | 18.2 | S9+AMP(8)   | 17.3 | S2 <i>pts</i> promotor delete(8)  | 16.9 | S2 <i>pts</i> promotor delete+AMP(8)  | 13   |
| S2(9)  | 17.2 | S10+AMP(9)  | 16.1 | S2 <i>pts</i> promotor delete(9)  | 16.6 | S2 <i>pts</i> promotor delete+AMP(9)  | 13.8 |
| S2(10) | 17.6 | S11+AMP(10) | 14.9 | S2 <i>pts</i> promotor delete(10) | 16.8 | S2 <i>pts</i> promotor delete+AMP(10) | 13.5 |
| S2(11) | 17.7 | S12+AMP(11) | 13.8 | S2 <i>pts</i> promotor delete(11) | 16.3 | S2 <i>pts</i> promotor delete+AMP(11) | 13.2 |
| S2(12) | 17.9 | S13+AMP(12) | 13.8 | S2 <i>pts</i> promotor delete(12) | 16.4 | S2 <i>pts</i> promotor delete+AMP(12) | 13.3 |



**Table S2 Primer for *pts* promoter and its mutation**

| Primer        | Primer sequence (5'→3')          |
|---------------|----------------------------------|
| promoter-F    | tgccagcttgttaaaaatg              |
| promoter-R    | tgtattccccaacttataggt            |
| P0a-F1        | ggcaagaccgatcttatctc             |
| P0a-R1        | cgcatcaaaaataatCagtctgg          |
| P0a-F2        | ttaaccagactGattatTTTg            |
| P0a-R2        | gtcacagtaatttcagaagt             |
| P1a-F1        | ctgatggaagaagaaggtat             |
| P1a-R1        | gtacgtTattaacattatgc             |
| P1a-F2        | gcataatgtttaatAacgtac            |
| P1a-R2        | agttaaccagatgttcaac              |
| P1b-F1        | ggcgttgaaactacaagaag             |
| P1b-R1        | ctgacgtttAgtacgtcatt             |
| P1b-F2        | gtttaatgacgtacTaaacgt            |
| P1b-R2        | acaacggtaccttgagtcag             |
| <i>pts</i> -F | acgtacgaaacgtcagcgggtcaacacccgcc |
| <i>pts</i> -R | ggcgggtgttgaccgctgacgtttcgtacgt  |
| 1-F           | Gcgtacgaaacgtcagcgggtcaacacccgcc |
| 1-R           | ggcgggtgttgaccgctgacgtttcgtacgC  |
| 3-F           | acTtacgaaacgtcagcgggtcaacacccgcc |
| 3-R           | ggcgggtgttgaccgctgacgtttcgtAgt   |
| 5-F           | acgtCcgaaacgtcagcgggtcaacacccgcc |
| 5-R           | ggcgggtgttgaccgctgacgtttcgGacgt  |
| 7-F           | acgtacTaaacgtcagcgggtcaacacccgcc |
| 7-R           | ggcgggtgttgaccgctgacgtttAgtacgt  |
| 9-F           | acgtacgaCacgtcagcgggtcaacacccgcc |
| 9-R           | ggcgggtgttgaccgctgacgtGtcgtacgt  |
| 11-F          | acgtacgaaaTgtcagcgggtcaacacccgcc |
| 11-R          | ggcgggtgttgaccgctgacAttcgtacgt   |
| 12-F          | acgtacgaaacAtcagcgggtcaacacccgcc |
| 12-R          | ggcgggtgttgaccgctgaTgtttcgtacgt  |
| 13-F          | acgtacgaaacgCcagcgggtcaacacccgcc |
| 13-R          | ggcgggtgttgaccgctgGcgtttcgtacgt  |
| 15-F          | acgtacgaaacgtcCgcgggtcaacacccgcc |
| 15-R          | ggcgggtgttgaccgcGgacgtttcgtacgt  |
| 17-F          | acgtacgaaacgtcagTggtcaacacccgcc  |
| 17-R          | ggcgggtgttgaccActgacgtttcgtacgt  |
| all-mut-F     | gatccatccgttccagcgggtcaacacccgcc |
| all-mut-R     | ggcgggtgttgaccgctggaacggatggatc  |

Note: Capital letter indicates mutated point.

**Table S3 Primer for qRT-PCR.**

K12

| Gene           | Primer sequence (5'→3')                                 | Gene        | Primer sequence (5'→3')                                      |
|----------------|---------------------------------------------------------|-------------|--------------------------------------------------------------|
| <i>16s DNA</i> | F catgccgcgtgtatgaagaa<br>R cgggtaacgtcaatgagcaaa       | <i>crr</i>  | F ataccggaactattgagatc<br>R atcagattcgatagagaatg             |
| <i>trxA</i>    | F attcacctgactgacgacagtttg<br>R gccagggttttgatc gatgttc | <i>ampC</i> | F cagcccgtcacacagcaaac<br>R ccagcagtgtaggttgcgagatg          |
| <i>ahpC</i>    | F gtcttcttcttaccggctgac<br>R cgccgatcatgcatatttg        | <i>bolA</i> | F tagaagaaaaattaagggcgggcg<br>R ggtagtagagagttctccgctaaagtac |
| <i>bcp</i>     | F tctaccgaaagccatgaccc<br>R acctgggtgctcctcatcagacag    | <i>ompR</i> | F tagtcagagcaacccgatgcc<br>R ttaccgccttctctgtgacg            |
| <i>gor</i>     | F cgggctggaatacgggtatt<br>R aatcatcgggtcgaagctgc        | <i>crp</i>  | F aaaagcggaaacgctgtactacatc<br>R cgaaattcagccattcagagg       |
| <i>yfcG</i>    | F cggaatthttgcgcatttcg<br>R gcctacctgccagaataaccactg    | <i>cpdA</i> | F ggatcaatcctctcgggcct<br>R aacacctggctatccagcaacag          |
| <i>sodB</i>    | F acctgattaagggtaccgcgtttg<br>R caaaagatcggcgatagcttc   | <i>cyaA</i> | F ggcgaagattgtggctccac<br>R cgagatccagccattcatttgg           |
| <i>sodC</i>    | F tagggcagtc aattggtagcgtc<br>R ttttgggatcaagatgcccg    | <i>pykA</i> | F aaaagtactggaagttcagggcatg<br>R ggggaaggagacagccaggtaatcta  |
| <i>oxyR</i>    | F taccgtgctgcgtgaggtga<br>R tgggtctgtcctcatgcagat       | <i>pykF</i> | F accgccattgaaggtaaacaaagt<br>R cttacgaataaaggaagcagcaaca    |
| <i>uvrD</i>    | F tggcagaaggtgtatcaggcg<br>R tccacgcgtactgaatgtgttg     | <i>ribB</i> | F tgaagaccgtgaaaacgaaggtg<br>R taaaaccgggtccataggcg          |
| <i>dam</i>     | F gtactgatgagtacgtacaggccgc<br>R ccgcgcagattgtaacgaca   | <i>ribF</i> | F gcgggaaaaactgcgttacc<br>R aaatgccttcacgaccagc              |
| <i>dpoI</i>    | F gtgccgccagaactgatcatc<br>R gagcttcgctgccattgttttc     | <i>tktB</i> | F cgcagtttaaccagccagacc<br>R cgtcggtaaaccagccttctgt          |
| <i>xth</i>     | F gctgaccaaaagagacgccga<br>R cgtttgagttcggttccaggtag    | <i>tktA</i> | F aagtgggttacaccgctgggtg<br>R atgccttccatcatgcagcc           |
| <i>nfo</i>     | F cccacgacagttatctgattaacc<br>R gattcggcaatcacgcgcaag   | <i>zwf</i>  | F tcatgaaagaaaccattgatgaagg<br>R tgcaaatgcgcaaaaagtg         |
| <i>recJ</i>    | F gcagcggaaagcgtacattaac<br>R cgcgaccagatccagcagtt      | <i>gnd</i>  | F tgaaaggtccttctattatgcctgg<br>R gttcttcgttggtagggtcagg      |
| <i>alkA</i>    | F agaacctgttccgcagagtg<br>R cgctcaccagttggcctaaaa       | <i>glk</i>  | F tgcgcatctggtccatgt<br>R aaattcaccagcccaggg                 |
| <i>mug</i>     | F aaggtgatatacaggccgggttt<br>R ttcaatcagcttacgcccgc     | <i>pfkA</i> | F ctgactacactatcggtttcttact<br>R accacaacgaattcacagcc        |
| <i>tag</i>     | F gaagggcagcaggctggatt<br>R gcccgcgcatccaataat          | <i>pfkB</i> | F tggtcataagcggaaagcct<br>R ccagcgcactgagttctttt             |
| <i>recC</i>    | F aattgctggagcgcgaagac<br>R tgcttctcccagcccttaac        | <i>aceE</i> | F gttgagcgtgctcagatct<br>R cacggaagaagtggttaaag              |
| <i>ssB</i>     | F cgctggctacttccgaatcc<br>R tctgtggtgtagcgatectgacc     | <i>ptsG</i> | F gtggcttctgttcaaatg<br>R tcccagaagaatacagattg               |
| <i>mutL</i>    | F tatcagttcggtttcccgc<br>R aatgcggcggatgatctcat         | <i>ptsI</i> | F atcatagccctgattaaga<br>R ctcaggtcgataatcttcag              |
| <i>mutY</i>    | F cgctcgacgaagttctcact<br>R cccagagaaaagcagagaatcg      | <i>ptsH</i> | F agaagctaagggttctcact<br>R tctgcggagatagtcacaac             |
| <i>mutH</i>    | F caagatthttgctgctctgggc<br>R ctcgccttcaaccggtatcc      | <i>rpoS</i> | F agctgaacgthttacctgcga<br>R tgtccagcaacgctthtttcg           |
| <i>mutS</i>    | F cgacgcgtcgtaatctggaa                                  | <i>dinB</i> | F gcaaagtctcagcggcaaaa                                       |

R ctgcaatgcgccaatagtttg

R gatttcgcaaccgttcgct

---

EIB202

| Gene           |   | Primer sequence (5'→3') |
|----------------|---|-------------------------|
| <i>16s DNA</i> | F | ctggaactgagacacggtcc    |
|                | R | ggtgcttcttctgcgggtaa    |
| <i>ptsG</i>    | F | tgatgctgccggtatcagtc    |
|                | R | gcttggaaagcaatctcttcc   |
| <i>ptsI</i>    | F | aaggcgcttcttctgaaaga    |
|                | R | tgctcaagctcttcatcttc    |
| <i>ptsH</i>    | F | caaagcattcgcttctgaca    |
|                | R | ggcgttctgctcatcttcac    |
| <i>crr</i>     | F | atcggtaaaatctttgaaact   |
|                | R | atcagctccttgatctcatc    |

---

**Table S4 Primers for *aceE* and its point mutation**

| Primer         | Primer sequence (5'→3')                    |     |
|----------------|--------------------------------------------|-----|
|                |                                            | 304 |
|                |                                            | 305 |
| <i>aceE</i> -F | gccgagctc atgtcagaacgtttcccaaatgacg        | 306 |
| <i>aceE</i> -R | ccgctcgagttacgccagacgcgggtaactttatc        | 307 |
| m1-F           | gttctcggtgac GCTgaaatggacgaaccggaatcc      | 308 |
| m1-R           | ggttcgtccatttcAGCgtcaccgaggaacgcgtaa       | 309 |
| m2-F           | gttctcggtgacTCTgaaatggacgaaccggaatcc       | 310 |
| m2-R           | ggttcgtccatttcAGAgtcaccgaggaacgcgtaa       | 311 |
| m3-F           | gttctcggtgacATGgaaatggacgaaccggaatcc       | 312 |
| m3-R           | ggttcgtccatttcCATgtcaccgaggaacgcgtaa       | 313 |
| m4-F           | tggcttcggttateCAGtgaacctgcagcgtcttgacg     | 314 |
| m4-R           | gctgcaggttaca CTGgataacgaagaccaggttate     | 315 |
| m5-F           | tcttcgt tatcaacAGTaaacctgcagcgtcttgacg     | 316 |
| m5-R           | agacgctgcaggtt ACTgttgataacgaagaccaggttate | 317 |
| m6-F           | tcttcgt tatcaacAATAacctgcagcgtcttgacg      | 318 |
| m6-R           | agacgctgcaggtt ATTgttgataacgaagaccaggttate | 319 |
| m7-F           | actgtaacctgcagGCActgacggcccggtcaccggt      | 320 |
| m7-R           | accgggcccgtcaag TGCctgcaggttacagttgataacg  | 321 |
| m8-F           | acctgcagc gtctt GCCggcccggtcaccggtaacg     | 322 |
| m8-R           | ccggtagccgggcc GGCaagacgctgcaggttacagttg   | 323 |
|                |                                            | 324 |

Note: Capital letter indicates mutated point.
